1       DOWN-REGULATION OF A HUMAN HERPESVIRUS 1 (HHV-1) MICRORNA  
2                               IN INFECTED CELLS BY GONIOTHALAMIN TREATMENT

3               Chee Wai YIP<sup>1</sup>, Norefrina Shafinaz MD NOR<sup>1</sup>, and Nazlina IBRAHIM<sup>1\*</sup>

4

5               <sup>1</sup>Department of Biological Science and Biotechnology, Faculty of Science and  
6       Technology, Universiti Kebangsaan Malaysia, 43600 Bangi, Selangor, Malaysia.

7

8                                               \*E-mail: [nazlina@ukm.edu.my](mailto:nazlina@ukm.edu.my)

9 **Abstract**

10 Goniiothalamine (GTN) has been proven to cause cell cycle arrest and apoptosis in  
11 human herpesvirus 1 (HHV-1) infected cells, but interestingly our preliminary  
12 transcriptomic analysis revealed other possible modes of action. The data showed that  
13 GTN treatment of HHV-1 clinical strain infected cells induced expression of the  
14 *KLHL24* gene that encodes the Kelch-like 24 protein (KLHL24), a transcriptional  
15 inhibitor of HHV-1 immediate-early and early genes. An miRNA, hsv1-miR-H27,  
16 produced by HHV-1 has also been discovered to control the expression of KLHL24.  
17 In order to understand the cause of *KLHL24* up-regulation, a time point study was  
18 conducted to investigate the effect of GTN on *KLHL24* and hsv1-miR-H27 expression.  
19 Through RT-qPCR analysis, we found that HHV-1 down-regulated *KLHL24*  
20 significantly ( $p < 0.05$ ) starting from 12 hpi, while a significant up-regulation ( $p <$   
21  $0.05$ ) was observed upon GTN treatment of the infected cells at 4 and 8 hpi. For  
22 protein level analysis, significant down-regulation of KLHL24 ( $p < 0.05$ ) was  
23 observed at all time points in HHV-1 infected cells. Intriguingly, treatment with GTN  
24 on HHV-1 infected cells showed no significant changes in protein expression  
25 compared to cells without any treatment. In addition, the miRNA hsv1-miR-H27 was  
26 detected from 16 hpi and treatment with GTN on infected cells showed down-  
27 regulation of the miRNA. This was in congruity with the recovery of *KLHL24* down-  
28 regulation in GTN treated HHV-1 infected cells, confirming that GTN caused down-  
29 regulation of hsv1-miR-H27 that governs the expression of *KLHL24*. This study  
30 provides insights that GTN could be a potential multifaceted antiviral.

31 **Keywords:** *Goniiothalamus umbrosus*, microRNA, hsv1-miR-H27, Kelch-like 24  
32 protein.

### 33 **Importance**

34 This study provides evidence that GTN possesses a distinct mode of antiviral activity against  
35 HHV-1 compared to currently available antivirals. Our findings showed that GTN  
36 caused the down-regulation of a viral miRNA, which inhibits the expression of a  
37 cellular protein known as KLHL24. This protein serves as a transcriptional inhibitor  
38 of HHV-1 immediate-early and early genes. The down-regulation of this miRNA leads  
39 to the up-regulation of KLHL24 and eventually halted HHV-1 replication. With the  
40 previously reported antiviral mechanism and the outcome of this study, GTN is a  
41 potential multifaceted anti-HHV-1 agent.

42

### 43 **Introduction**

44 Human herpesvirus 1 (HHV-1) is a highly prevalent member of the Herpesviridae  
45 family. The virus has double-stranded DNA and has infected almost 63% of the  
46 human population below the age of 50 (James et al. 2020). To date, HHV-1 infections  
47 have caused many clinical complications in both immunocompetent and  
48 immunocompromised people, including cold sores, acute retinal necrosis, herpes  
49 keratitis, esophagitis in transplant patients and encephalitis, which may lead to the  
50 death of the infected person (Crimi et al. 2019). Acyclovir (ACV) is an anti-herpetic  
51 drug that specifically quells the DNA replication of herpesviruses (Gnann et al. 1983)  
52 and was used as a first line treatment to treat primary and recurrent HHV infections.  
53 Although this drug is unable to cure latent HHV-1 infections, it has been shown to  
54 reduce HHV-1 latency in infected patients (Sawtell et al. 2001). Unfortunately, due to  
55 the uncontrolled use of ACV as prophylaxis and in the treatment of  
56 immunocompromised patients, resistant strains have emerged (Bacon et al. 2003;

57 Wang et al. 2011). The ability of the virus to confer resistance is caused by mutations,  
58 either by addition or deletion, which occur in the *UL23* or *UL30* genes that contribute  
59 to the production of different phenotypes of thymidine kinase and DNA polymerase  
60 enzymes respectively, thus rendering the drug treatment a failure (Piret & Boivin  
61 2011). Although new drugs such as penciclovir, famciclovir, cidofovir and foscarnet  
62 (Superti et al. 2008) have been used to counter the infection of resistant strains, the  
63 same restriction has occurred due to the same drug target in the drug design (Piret &  
64 Boivin 2011; Wyles et al. 2005). Nonetheless, some of the drugs might pose  
65 unwanted side effects for administered patients (Upadhyayula & Michaels 2013).  
66 Therefore, this urges the need to search for new anti-HHV agents with novel  
67 mechanisms and targets.

68 Plants are a great source of different groups of secondary metabolites with  
69 antiviral properties (Ben-Shabat et al. 2019). The challenges posed by the emergence  
70 of antiviral resistant variants have driven scientific communities to search for new  
71 antiviral agents from plant sources as some plant extracts exert multifaceted antiviral  
72 mechanisms (Álvarez et al. 2011; Schnitzler et al. 2009). *Goniothalamus umbrosus*,  
73 also known as 'kenerak', is an indigenous plant of Malaysia that possesses various  
74 biological properties including antibacterial, antioxidant, anticancer, and antiviral  
75 activities (Abdelwahab et al. 2009; Abdul-Wahab et al. 2011). In addition,  
76 styrylpyrone derivative (GTN), a bioactive compound isolated from *G. umbrosus* and  
77 other species (Jewers et al. 1972; Wiart 2007) has shown potent anti-HHV-1 activity  
78 without posing cytotoxic effects on tested cell lines, making it a potential anti-HHV-1  
79 candidate (Md Nor 2011; Moses et al. 2014). Recent findings reported that GTN plays  
80 a role in arresting the cell cycle that eventually leads to apoptosis of the infected cells  
81 (Md Nor & Ibrahim 2012). Apart from that, the preliminary transcriptomic analysis of

82 Md Nor (2015), using the Next Generation Sequencing (NGS) platform, showed that  
83 treatment with GTN on HHV-1 infected Vero cells up-regulated the expression of a  
84 cellular protein, namely Kelch-like 24 (*KLHL24*) protein. This protein has been  
85 shown to exhibit transcriptional repression of HHV-1 immediate early and early genes  
86 (Wu et al. 2013).

87 Moreover, in order to survive in the host, HHV-1 encodes microRNAs  
88 (miRNAs) that control viral gene expression and enable the virus to stay dormant in  
89 the host neuron through a process known as latency (Umbach et al. 2008). Latency is  
90 maintained by an HHV-1 non-coding transcript which is termed latency associated  
91 transcript (LAT). It has been shown that LAT produces miRNAs that can control the  
92 gene expression of HHV-1 infected cell protein (*ICP 0* and *ICP 4* which are two key  
93 transactivators of HHV-1 early gene transcription (Umbach et al. 2008). Besides  
94 manipulating viral transcripts, HHV-1 also encodes miRNA that is capable of  
95 interfering with host gene expression. The miRNA hsv1-miR-H27 has been proven to  
96 cause down-regulation of the host *KLHL24* gene (Wu et al. 2013). However, this  
97 miRNA has only been reported in the HHV-1 F strain. No other studies reported the  
98 presence of this miRNA in other HHV-1 strains and the presence of miRNA could be  
99 viral strain specific (Kim et al. 2012). Therefore, it is necessary to identify the  
100 presence of this miRNA in other HHV-1 strains in order to confirm the regulation of  
101 *KLHL24* during HHV-1 infection.

102 This study was conducted to investigate the relationship between *KLHL24* and  
103 hsv1-miR-H27 in the absence and presence of GTN by comparing the expression  
104 level of both of these elements in HHV-1 infected cells. The outcome of this study  
105 will contribute new insights into the anti-HHV-1 properties of GTN and provide

106 strong evidence to develop GTN as an anti-HHV-1 agent with distinct and different  
107 modes of action compared to existing chemically synthesised anti-herpetic drugs.

108

## 109 **Materials and Methods**

### 110 **Cell Culture and Virus Propagation**

111 An African green monkey kidney (Vero) cell line ATCC CCL-81 purchased from  
112 American Type Culture Collection (ATCC) was used in this study. The cell line was  
113 cultured and maintained in Dulbecco's modified eagle medium (DMEM)  
114 supplemented with fetal bovine serum (FBS) 5% (complete medium) and incubated at  
115 37°C in the presence of 5% CO<sub>2</sub>. A clinical strain of human herpesvirus 1 (HHV-1)  
116 was propagated in the Vero cell line. Virus titre determination was performed using  
117 plaque assay as described by Blaho et al. (2005) with slight modifications. GTN was  
118 extracted according to the method described by Jewers et al. (1972).

119

### 120 **Treatments in Vero Cells**

121 Vero cells were grown until 80% confluency was reached in 25 cm<sup>2</sup> cell culture flasks  
122 (SPL Life Sciences, Korea). Four treatments were given to the Vero cells in each  
123 group which included cells mock treated with complete medium, cells treated with  
124 12.5 µM GTN, cells infected with HHV-1 at a multiplicity of infection (MOI) of 1  
125 and HHV-1 clinical strain infected cells treated with 12.5 µM GTN. For treatments  
126 involving virus infection, the cells were infected with HHV-1 and 2 hours allowed for  
127 adsorption. After the adsorption period, the medium was aspirated to remove  
128 unadsorbed viruses and replaced with new complete medium or complete medium

129 containing GTN. Mock treated Vero cells were used as a control. Treatments were  
130 given for a specific period (i.e., 4, 8, 12, 16, 18, 20 and 24 hours post infection, hpi)  
131 and flasks containing cells with different treatments were flash-frozen in liquid  
132 nitrogen prior to RNA isolation to attenuate further gene expression occurring in the  
133 cells (Yip et al. 2018).

134

### 135 **RNA Isolation and Reverse Transcription Quantitative Real-Time Polymerase** 136 **Chain Reaction (RT-qPCR)**

137 Total RNA was isolated using TRIsure (Bioline, USA) and reverse transcribed into  
138 cDNA before qPCR was performed. First strand cDNA was synthesised using a Tetro  
139 cDNA synthesis kit (Bioline, USA) according to the manufacturer's protocol. The  
140 cDNA of each sample was then diluted 5× prior to qPCR analysis. qPCR was  
141 conducted using SensiFast Sybergreen Mastermix (Bioline, USA) using a pair of  
142 primers specific to *KLHL24* with annealing temperature of 53°C; forward primer: 5'-  
143 TGAGAAGACCACTGTTACACGAGC-3' and reverse primer: 5'-  
144 CCTTGGGGACATCATTTTCATTC-3'. For miRNA expression analysis, qPCR was  
145 conducted with an annealing temperature of 60°C with a forward primer having a  
146 sequence of 5'-CGGGTCTGCATTCAAACACAG-3' and a reverse primer having a  
147 sequence of 5'- CAGACCCCTTTCTCCCCC-3'.

148

### 149 **qPCR Analysis**

150 Absolute quantification was applied to compare the mRNA transcript of *KLHL24* and  
151 hsv1-miR-H27 between different treatments. A standard curve was produced by using  
152 five dilutions of 10-fold serially diluted *KLHL24* cDNA starting at 200 ng. For hsv1-

153 miR-H27 a standard curve was produced by synthetic oligo synthesised by Integrated  
154 DNA Technology (IDT) containing a cDNA sequence of hsv1-miR-H27. Information  
155 obtained from the qPCR standard curve was used to estimate the amount of mRNA  
156 transcript using the following equation (Illumina 2010):

157  $Quantity = 10^{(Cq-b)/m}$

158 Where,  $Cq = Ct$  values obtained from qPCR result

159  $b = y$ -intercept of the standard curve

160  $m =$  gradient of the slope

161

## 162 **Western Blot for Protein Analysis**

163 The organic phase remaining from the previous RNA isolation step for each time  
164 point and treatment was used for protein isolation as described by the manufacturer's  
165 protocol. The isolated protein was then subjected to Bradford assay for determination  
166 of protein concentration. A total of 50  $\mu$ g of protein from each treatment was used for  
167 sodium dodecyl sulphate polyacrylamide gel electrophoresis (SDS-PAGE) and  
168 subsequently Western blotting following the protocol suggested by Mahmood and  
169 Yang (2012) with slight modifications. SDS-PAGE was carried out at 75V for 25  
170 minutes followed by 100V for 90 minutes. The separated protein was transferred to a  
171 nitrocellulose membrane in Towbin buffer 1 $\times$  using the Mini Trans-Blot system  
172 (Biorad, United States) at 120mA for 120 minutes in ice cold conditions. The primary  
173 antibody used for binding to KLHL24 was goat polyclonal antibody IgG anti-  
174 KLHL24 at a dilution of 1:500 (Santa-Cruz Biotechnology, Inc., United States). For  
175 GAPDH, mouse monoclonal antibody IgG2b anti-GAPDH at a dilution of 1:5000 was



176 used. Secondary antibodies were polyclonal antibody anti-IgG goat (GeneTex, Inc.,  
177 United States) and anti-IgG1 mouse (Abcam, United Kingdom), both conjugated with  
178 horseradish peroxidase (HRP). The substrate for signal detection of the proteins was  
179 WesternBright™ Sirius kit (Advansta, Inc., United States).

180

### 181 **Reverse Transcription using a Two-tailed cDNA Synthesis Primer**

182 Two-tailed RT-qPCR was utilised to detect the presence of miRNA hsv1-miR-H27  
183 and also to study the expression profile of this miRNA when different treatments were  
184 given to the cells. For detection of hsv1-miR-H27, HHV-1 at MOI 5 was infected to  
185 Vero cells for 24 hours before cells were flash-frozen and RNA isolated. For the  
186 determination of miRNA expression profile, total RNA in section 2.3 at different time  
187 points were used.

188 First strand cDNA was synthesised using a two-tailed RT primer designed  
189 specifically to target hsv1-miR-H27 as described in Androvič et al. (2017).  
190 Approximately 500 ng of the total RNA was used for cDNA synthesis using Tetro  
191 cDNA synthesis kit with a protocol of 25°C for 45 minutes followed by 85°C for 5  
192 minutes to terminate the reverse transcriptase activity. The sequence for the two-tailed  
193 primer used in cDNA synthesis was 5'-  
194 GGGTCTGCATTCAAACACAGCTAGAGAACCTAGCTGATCAATTCAAAGAG  
195 G-3'.

196

### 197 **Cloning and Sequencing of hsv1-miR-H27 qPCR Product**

198 The qPCR product for hsv1-miR-H27 was first subjected to agarose gel  
199 electrophoresis and the band complementary to the size of cDNA was excised and  
200 purified using NucleoSpin® Gel and PCR Clean-up (Macherey-Nagel, Germany).  
201 The purified product was cloned into T&A™ cloning vector by using T&A™  
202 Cloning Vector (Yeastern Biotech Co., Ltd, Taiwan) and followed by a  
203 transformation into *Escherichia coli* E. cloni® 10G strain. Positive transformants  
204 were selected using a blue-white screening method. White colonies were picked for  
205 colony PCR to further confirm positive transformants. The recombinant plasmid was  
206 extracted from the positive transformant using Qiagen® Plasmid Mini (Qiagen, USA)  
207 and sequenced (Advanced Innovative Trusted Products & Solutions, AITbiotech Pte.  
208 Ltd., Singapore).

209

## 210 **Results and Discussion**

### 211 **The effect of *KLHL24* expression in GTN treated HHV-1 infected or non-infected** 212 **cells**

213 RT-qPCR analysis showed that the level of *KLHL24* in HHV-1 infected cells was  
214 similar to that of the cell only control at time points 4 and 8 hpi but decreased  
215 gradually and significantly from 12 hpi (Figure 1). The result is congruent with the  
216 study of Wu et al. (2013) where *KLHL24* expression decreased in a time dependent  
217 manner coupled with the increase in hsv1-miR-H27. In GTN treated cells, the level of  
218 *KLHL24* was higher than the control at all time points. Although treatment of GTN on  
219 infected cells increased the expression of *KLHL24* to a level higher than the cell  
220 control at earlier time points (4 – 12 hpi), the expression was shown to be slightly  
221 lower than the cell control at later time points (16 – 24 hpi). This indicates that the

222 ability of GTN in up-regulating *KLHL24* decreases gradually with time but is still  
223 able to maintain similar expression levels as the cell only control.

224 Expression in the transcriptional level does not always correlate with the  
225 translational level due to post-transcriptional regulation (Edfors et al. 2016). Hence,  
226 the protein level expression of *KLHL24* was further investigated. Results from  
227 Western blot analysis revealed that GTN treatment on non-infected cells showed less  
228 than 50% up-regulation of *KLHL24* protein level relative to the cell only control and  
229 was observed to be not significant at some of the time points (Figure 2). *KLHL24*  
230 possesses an auto-ubiquitination nature to control its protein level expression if the  
231 expression exceeds a normal threshold (Lin et al. 2016). Thus, this property of a  
232 negative feedback mechanism might have contributed to the insignificant up-  
233 regulation of this protein.

234 In HHV-1 infected cells, the virus significantly down-regulated the expression  
235 of *KLHL24* at all time points. Interestingly, GTN successfully up-regulated *KLHL24*  
236 despite the ability of HHV-1, which was shown to inhibit the expression of this  
237 protein. As a result, we proved that GTN is able to rescue the down-regulation of  
238 *KLHL24* caused by HHV-1 infection at both the transcript and protein level.

239 *KLHL24* has been reported as a transcriptional inhibitor for HHV-1 immediate  
240 early and early genes, especially *ICP4* (Wu et al. 2013). Additionally, *ICP4* functions  
241 as a transactivator of HHV-1 early and late genes (Lester & DeLuca 2011). It has  
242 been shown that inhibiting the expression of *ICP4* will block HHV-1 replication  
243 (Wang et al. 2018). Furthermore, treatment with GTN on HHV-1 infected cells led to  
244 a down-regulation of *ICP4* expression (Md Nor 2015). Therefore, we suggest that the

245 up-regulation of *KLHL24* in GTN treated HHV-1 infected cells inhibited ICP4  
246 expression, thereby halting viral replication.

247 In addition, cell cycle arrest and apoptosis led to an up-regulation of *KLHL24*  
248 (Cellai et al. 2009; Hill et al. 2014). GTN has been known to cause cell cycle arrest  
249 and apoptosis as the anti-HHV-1 mechanism (Md Nor & Ibrahim 2012). Hence, in  
250 this study the up-regulation of *KLHL24* is due to the induction of cell cycle arrest and  
251 apoptosis by GTN. However, the role of *KLHL24* in cell cycle arrest and apoptosis  
252 remains elusive to researchers. As *KLHL24* is a multifunctional protein (Hedberg-  
253 Oldfors et al. 2016; Laezza et al. 2007; Lin et al. 2016), the up-regulation of this  
254 protein could lead to the induction of a network of pathways both in the infected host  
255 and the virus.

#### 256 **Detection of hsv1-miR-H27 in HHV-1 Clinical Strain**

257 The miRNA hsv1-miR-H27 was previously reported in HHV-1 F strain (Wu et al.  
258 2013; Du et al. 2015). Nonetheless, the presence of this miRNA is still unknown in  
259 other HHV-1 strains and some of the miRNAs are strain specific (Kim et al. 2012).  
260 Therefore, the presence of the miRNA needs to be confirmed in the strain used in this  
261 study. The result from qPCR produced an amplicon with a size of approximately 70  
262 bp, corresponding to the size of the cDNA which was 68 bp (Figure 3). As it is not  
263 practical to sequence a short amplicon, a recombinant plasmid containing the qPCR  
264 product was produced for sequencing purposes. The sequence of the recombinant  
265 plasmid revealed the presence of 100% sequence similarity of hsv1-miR-H27 in the  
266 tested HHV-1 clinical strain. The presence of this miRNA causes down-regulation of  
267 *KLHL24* in HHV-1 infected cells. This observation was further confirmed by the  
268 miRNA expression study below.

269

270 **The Effect of GTN Treatment on the Expression of hsv1-miR-H27**

271 GTN treatment was shown to cause overexpression of *KLHL24* (Md Nor 2015) and  
272 HHV-1 has the ability to control *KLHL24* expression by producing hsv1-miR-H27  
273 (Wu et al. 2013). The effect of GTN treatment on the miRNA expression was also  
274 tested to identify whether an increase in *KLHL24* expression would cause an increase  
275 in the miRNA expression. Our results showed that the miRNA was not detected at an  
276 early time point, contradicting the results shown by Wu et al. (2013). This might be  
277 due to the different strain of HHV-1 used in the current study compared to the  
278 previous study. By 16 hpi, the virus has completed the first round of replication and  
279 produced more progeny which produces more miRNA to a level that could be  
280 detected at this time point. This was also observed in other studies, which showed the  
281 level of miRNA expression was correlated with virus titre (Duan et al. 2012; Flores et  
282 al. 2013). Therefore, an increase in miRNA level results in significant down-  
283 regulation of *KLHL24* that was observed from 16 hpi (Figure 3 and 4).

284 Surprisingly, treatment with GTN did not cause up-regulation of the miRNA.  
285 Instead, the expression of miRNA was reduced after infected cells were treated with  
286 GTN (Figure 4). This result suggested that GTN treatment on the infected cells  
287 influenced the expression of this miRNA. Previously, it had been determined that  
288 GTN treatment down-regulated the expression of *ICP0*, an immediate early gene of  
289 HHV-1 (Md. Nor 2015). The miRNA was predicted to be produced from a precursor,  
290 the 3'-untranslated region (UTR) of the *ICP0* gene (Wu et al. 2013). Hence, the  
291 down-regulation of hsv1-miR-H27 by GTN treatment was hypothesised to be  
292 contributed to by the down-regulation of HHV-1 *ICP0*. Taken together, our results

293 show that GTN caused up-regulation of KLHL24 in HHV-1 infected cells by reducing  
294 the expression of hsv1-miR-H27 which is responsible for governing the expression of  
295 this gene.

296

## 297 **CONCLUSION**

298 The outcome of this study confirmed that GTN treatment of HHV-1 infected cells  
299 caused up-regulation of KLHL24 at gene and protein levels through the down-  
300 regulation of hsv1-miR-H27. The down-regulation of hsv1-miR-27 is more likely to  
301 be due to the down-regulation of its precursor gene, which affects viral replication.

302

## 303 **ACKNOWLEDGEMENT**

304 The authors would like to acknowledge the Malaysia Ministry of Higher Education  
305 for funding this project (FRGS/1/2016/STG04/UKM/02/1). We would also like to  
306 thank Prof. Mikael Kubista, Ing. Peter Androvič and the research team for their  
307 contribution in designing the two-tailed RT primer required in the RT-qPCR assay of  
308 miRNA.

309

## 310 **DECLARATION**

311 The authors declare no conflict of interest in preparing this article.

312

## 313 **REFERENCES**

- 314 Abdelwahab, S. I., Abdul, A. B., Elhassan, M. M., Mohan, S., Al-zubairi, A. S.,  
315 ALHaj, N. A., Abdullah, R. & Mariod, A. A. 2009. Biological and phytochemical  
316 investigations of *Goniothalamus umbrosus* leaves hexane extract. J. Med. Plant Res.  
317 3(11), 880-885. <https://doi.org/10.5897/JMPR.9000304>.
- 318 Abdul-Wahab, N. Z., Shahr, S., Abdullah-Sani, H., Pihie, A. H. L., & Ibrahim, N.  
319 2011. Antioxidant, antibacterial and antiviral properties of *Goniothalamus umbrosus*  
320 leaves methanolic extract. Afr. J. Microbiol. Res. 5(20), 3138-3143.  
321 <https://doi.org/10.5897/AJMR10.758>.
- 322 Álvarez, Á. L., Habtemariam, S., Juan-Badaturuge, M., Jackson, C., & Parra, F. 2011.  
323 In vitro anti HSV-1 and HSV-2 activity of *Tanacetum vulgare* extracts and isolated  
324 compounds: An approach to their mechanisms of action. Phytother. Res. 25(2), 296-  
325 301. <https://doi.org/10.1002/ptr.3382>.
- 326 Androvic, P., Valihrach, L., Elling, J., Sjoback, R. & Kubista, M. 2017. Two-tailed  
327 RT-qPCR: A novel method for highly accurate miRNA quantification. Nucleic Acids  
328 Res. 45(15), 208–219. <https://doi.org/10.1093/nar/gkx588>.
- 329 Bacon, T. H., Levin, M. J., Leary, J. J., Sarisky, R. T., & Sutton, D. 2003. Herpes  
330 simplex virus resistance to acyclovir and penciclovir after two decades of antiviral  
331 therapy. Clin. Microbiol. Rev. 16(1), 114-128. [https://doi.org/10.1128/CMR.16.1.114-](https://doi.org/10.1128/CMR.16.1.114-128.2003)  
332 128.2003.
- 333 Ben-Shabat, S., Yarmolinsky, L., Porat, D., & Dahan, A. 2020. Antiviral effect of  
334 phytochemicals from medicinal plants: applications and drug delivery  
335 strategies. Drug Deliv. Transl. Res. 10(2), 354-367. [https://doi.org/10.1007/s13346-](https://doi.org/10.1007/s13346-019-00691-6)  
336 019-00691-6

- 337 Blaho, J. A., Morton, E. R., & Yedowitz, J. C. 2005. Herpes simplex virus:  
338 propagation, quantification, and storage. *Curr. Protoc. Microbiol.* 00, 14E.1.1-  
339 14E.1.2314E-1. <https://doi.org/10.1002/9780471729259.mc14e01s00>.
- 340 Cellai, C., Laurenzana, A., Bianchi, E., Sdelci, S., Manfredini, R., Vannucchi, A. M.,  
341 Caporale, R., Balliu, M., Mannelli, F., Ferrari, S., Bosi, A., Miniati, D., Cocco, P. L.,  
342 Veronneau, S., Stankova, J. & Paoletti, F. 2009. Mechanistic insight into WEB-2170-  
343 induced apoptosis in human acute myelogenous leukemia cells: the crucial role of  
344 PTEN. *Exp. Hematol.* 37(10), 1176-1185.  
345 <https://doi.org/10.1016/j.exphem.2009.07.002>.
- 346 Crimi, S., Fiorillo, L., Bianchi, A., D'Amico, C., Amoroso, G., Gorassini, F.,  
347 Mastroieni, R., Marino, S., Scoglio, C., Catalano, F., Campagna, P., Bocchieri, S., De  
348 Stefano, R., Fiorillo, M. T., & Cicciù, M. 2019. Herpes virus, oral clinical signs and  
349 QoL: Systematic review of recent data. *Viruses* 11(5), 463.
- 350 Du, T., Han, Z., Zhou, G., & Roizman, B. 2015. Patterns of accumulation of miRNAs  
351 encoded by herpes simplex virus during productive infection, latency, and on  
352 reactivation. *Proc. Natl. Acad. Sci.* 112(1), E49-E55.  
353 <https://doi.org/10.1073/pnas.1422657112>.
- 354 Duan, F., Liao, J., Huang, Q., Nie, Y. and Wu, K. 2012. HHV-1 miR-H6 inhibits  
355 HHV-1 replication and IL-6 expression in human corneal epithelial cells in vitro. *Clin.*  
356 *Exp. Immunol.* 2012, 1 -8. <https://doi.org/10.1155/2012/192791>.
- 357 Edfors, F., Danielsson, F., Hallström, B. M., Käll, L., Lundberg, E., Pontén, F.,  
358 Forsström, B. & Uhlén, M. 2016. Gene-specific correlation of RNA and protein levels  
359 in human cells and tissues. *Mol. Syst. Biol.* 12(10), 883.  
360 <https://doi.org/10.15252/msb.20167144>.



- 361 Flores, O., Nakayama, S., Whisnant, A.W., Javanbakht, H., Cullen, B.R. & Bloom,  
362 D.C. 2013. Mutational inactivation of herpes simplex virus 1 microRNAs identifies  
363 viral mRNA targets and reveals phenotypic effects in culture. *J. Virol.* 87(12): 6589 –  
364 6603. <https://doi.org/10.1128/JVI.00504-13>.
- 365 Gnann, J. W., Barton, N. H., & Whitley, R. J. 1983. Acyclovir: mechanism of action,  
366 pharmacokinetics, safety and clinical applications. *Pharmacotherapy* 3(5), 275-283.  
367 <https://doi.org/10.1002/j.1875-9114.1983.tb03274.x>.
- 368 Hedberg-Oldfors, C., Danielsson, O., Hübbert, L., Nennesmo, I., Abramsson, A.,  
369 Banote, R., Edling, M., Zetterberg, H. & Oldfors, A. 2016. Hypertrophic  
370 cardiomyopathy and abnormal glycogen storage in heart and skeletal muscle  
371 associated with inactivation of KLHL24. *Neuromuscul. Disord.* 26, S152.  
372 <https://doi.org/10.1016/j.nmd.2016.06.242>.
- 373 Hill, R., Kalathur, R. K. R., Callejas, S., Colaço, L., Brandão, R., Serelde, B., Cebriá,  
374 A., Blanco-Aparicio, C., Pastor, J., Futschik, M., Dopazo, A. & Link, W. (2014). A  
375 novel phosphatidylinositol 3-kinase (PI3K) inhibitor directs a potent FOXO-  
376 dependent, p53-independent cell cycle arrest phenotype characterized by the  
377 differential induction of a subset of FOXO-regulated genes. *Breast Cancer Res.* 16(6),  
378 1-15. <https://doi.org/10.1186/s13058-014-0482-y>.
- 379 Illumina. 2010. Absolute quantification of gene expression using SYBR green in the  
380 Eco™ real-time PCR system. Technical note:Real-Time PCR: 0–4.  
381 [https://www.illumina.com/Documents/products/technotes/technote\\_eco\\_absolute\\_ua  
382 ntification\\_using\\_sybrgreen.pdf](https://www.illumina.com/Documents/products/technotes/technote_eco_absolute_quantification_using_sybrgreen.pdf) [Accessed on 17th March 2021].
- 383 James, C., Harfouche, M., Welton, N. J., Turner, K. M., Abu-Raddad, L. J., Gottlieb,  
384 S. L., & Looker, K. J. 2020. Herpes simplex virus: global infection prevalence and

- 385 incidence estimates, 2016. *Bull. World Health Organ.* 98(5), 315.  
386 <http://dx.doi.org/10.2471/BLT.19.237149>.
- 387 Jewers, K., Davis, J. B., Dougan, J., Manchanda, A. H., Blunden, G., Kyi, A., &  
388 Wetchapinan, S. 1972. Goniotalamin and its distribution in four *Goniotalamus*  
389 species. *Phytochemistry* 11(6), 2025-2030. [https://doi.org/10.1016/S0031-](https://doi.org/10.1016/S0031-9422(00)90168-7)  
390 9422(00)90168-7.
- 391 Kim, Y., Lee, S., Kim, S., Kim, D., Ahn, J.H. & Ahn, K. 2012. Human  
392 cytomegalovirus clinical strain-specific microRNA miR-UL148D targets the human  
393 chemokine RANTES during infection. *PLoS Pathog.* 8(3).  
394 <https://doi.org/10.1371/journal.ppat.1002577>.
- 395 Laezza, F., Wilding, T. J., Sequeira, S., Coussen, F., Zhang, X. Z., Hill-Robinson, R.,  
396 Mulle, C., Huettner, J. E & Craig, A. M. 2007. KRIP6: a novel BTB/kelch protein  
397 regulating function of kainate receptors. *Mol. Cell. Neurosci.* 34(4), 539-550.  
398 <https://doi.org/10.1016/j.mcn.2006.12.003>.
- 399 Lester, J.T. & DeLuca, N.A. 2011. Herpes simplex virus 1 ICP4 forms complexes  
400 with TFIID and mediator in virus-infected cells. *J. Virol.* 85(12), 5733-5744.  
401 <https://doi.org/10.1128/JVI.00385-11>.
- 402 Lin, Z., Li, S., Feng, C., Yang, S., Wang, H., Ma, D., Zhang, J., Gou, M., Bu, D.,  
403 Zhang, T., Kong, X., Wang, X., Sarig, O., Ren, Y., Dai, L., Liu, H., Zhang, J., Li, F.,  
404 Hu, Y., Padalon-Brauch, G., Vodo, D., Zhou, F., Chen, T., Deng, H., Sprecher, E.,  
405 Yang, Y. & Tan, X. 2016. Stabilizing mutations of KLHL24 ubiquitin ligase cause  
406 loss of keratin 14 and human skin fragility. *Nat. Genet.* 48(12), 1508-1516.  
407 <https://doi.org/10.1038/ng.3701>.

- 408 Mahmood, T. & Yang, P.-C. 2012. Western blot: Technique, theory, and trouble  
409 shooting. *N. Am. J. Med. Sci.* 4(9), 429–434. [https://doi.org/10.4103/1947-](https://doi.org/10.4103/1947-2714.100998)  
410 2714.100998.
- 411 Md Nor, N. S. & Ibrahim, N. 2011. Styrylpyrone derivative of *Goniothalamus*  
412 *umbrosus* inhibit HHV-1 infection during viral early replication cycle. *Antivir. Res.*  
413 90, A21-A78.
- 414 Md Nor, N. S. & Ibrahim, N. 2012. Styrylpyrone derivative (SPD) induce cell cycle  
415 arrest during herpes simplex virus type-1 (HSV-1) infection. *Int. J. Infect. Dis.* 16,  
416 e97. <https://doi.org/10.1016/j.ijid.2012.05.225>.
- 417 Md Nor, N. S. 2015. Antiviral mechanism of styrylpyrone derivative (GTN)  
418 compound from *Goniothalamus umbrosus* against herpes simplex virus type-1. Ph.D  
419 Thesis, Universiti Kebangsaan Malaysia, Malaysia.
- 420 Moses, M., Md Nor, N. S. & Ibrahim, N. 2014. *In vitro* virucidal activity of a  
421 styrylpyrone derivative against herpes simplex virus strain KOS-1. *AIP Conference*  
422 *Proceedings*, 1614(1), 562-565. <https://doi.org/10.1063/1.4895262>.
- 423 Mukhtar, M., Arshad, M., Ahmad, M., Pomerantz, R. J., Wigdahl, B., & Parveen, Z.  
424 2008. Antiviral potentials of medicinal plants. *Virus Research*, 131(2), 111–120.  
425 <https://doi.org/10.1016/j.virusres.2007.09.008>.
- 426 Piret, J., & Boivin, G. 2011. Resistance of herpes simplex viruses to nucleoside  
427 analogues: mechanisms, prevalence, and management. *Antimicrob. Agents*  
428 *Chemother.*, 55(2), 459-472. <https://doi.org/10.1128/AAC.00615-10>.
- 429 Sawtell, N. M., Thompson, R. L., Stanberry, L. R., & Bernstein, D. I. 2001. Early  
430 intervention with high-dose acyclovir treatment during primary herpes simplex virus

- 431 infection reduces latency and subsequent reactivation in the nervous system in vivo. *J.*  
432 *Infect. Dis.* 184(8), 964-971. <https://doi.org/10.1086/323551>.
- 433 Schnitzler, P., Neuner, A., Nolkemper, S., Zundel, C., Nowack, H., Sensch, K. H., &  
434 Reichling, J. 2010. Antiviral activity and mode of action of propolis extracts and  
435 selected compounds. *Phyther. Res.* 24(S1)24, S20-S28.  
436 <https://doi.org/10.1002/ptr.2868>.
- 437 Superti, F., Ammendolia, M. G., & Marchetti, M. 2008. New advances in anti-HSV  
438 chemotherapy. *Curr. Med. Chem.* 15(9), 900-911.  
439 <https://doi.org/10.2174/092986708783955419>.
- 440 Umbach, J.L., Kramer, M.F., Jurak, I., Karnowski, H.W., Coen, D.M. & Cullen, B.R.  
441 2008. MicroRNAs expressed by herpes simplex virus 1 during latent infection  
442 regulate viral mRNAs. *Nature* 454(7205), 780–783.  
443 <https://doi.org/10.1038/nature07103>.
- 444 Upadhyayula, S., & Michaels, M. G. 2013. Ganciclovir, foscarnet, and cidofovir:  
445 Antiviral drugs not just for cytomegalovirus. *Pediatr. Infect. Dis. J.* 2(3), 286-290.  
446 <https://doi.org/10.1093/jpids/pit048>.
- 447 Wang, L., Chen, X., Zhou, X., Roizman, B. & Zhou, G.G. 2018. miRNAs targeting  
448 ICP4 and delivered to susceptible cells in exosomes block HSV-1 replication in a  
449 dose-dependent manner. *Mol. Ther.* 26(4), 1032–1039.  
450 <https://doi.org/10.1016/j.ymthe.2018.02.016>.
- 451 Wang, Y., Wang, Q., Zhu, Q., Zhou, R., Liu, J., & Peng, T. 2011. Identification and  
452 characterization of acyclovir-resistant clinical HHV-1 isolates from children. *J. Clin.*  
453 *Virol.* 52(2), 107-112. <https://doi.org/10.1016/j.jcv.2011.06.009>.

454 Wiart, C. 2007. Goniiothalamus species: a source of drugs for the treatment of cancers  
455 and bacterial infections? *Evid.-Based Complementary Altern. Med.* 4(3), 299-311.  
456 <https://doi.org/10.1093/ecam/nem009>.

457 Wu, W., Guo, Z., Zhang, X., Guo, L., Liu, L., Liao, Y., Wang, J., Wang, L., & Li, Q.  
458 2013. A microRNA encoded by HHV-1 inhibits a cellular transcriptional repressor of  
459 viral immediate early and early genes. *Sci. China Life Sci.* 56(4), 373-383.  
460 <https://doi.org/10.1007/s11427-013-4458-4>.

461 Wyles, D. L., Patel, A., Madinger, N., Bessesen, M., Krause, P. R., & Weinberg, A.  
462 2005. Development of herpes simplex virus disease in patients who are receiving  
463 cidofovir. *Clin. Infect. Dis.*, 41(5), 676-680. <https://doi.org/10.1086/432477>.

464 Yip, C. W., Md Nor, N. S. & Ibrahim, N. (2018, June). The importance of flash  
465 freezing in RNA isolation in virus infected cells. In *The 15<sup>th</sup> Symposium of Malaysian*  
466 *Society of Applied Biology*, (pp. 87-92). Malaysian Society of Applied Biology.

467

## 468 Figures

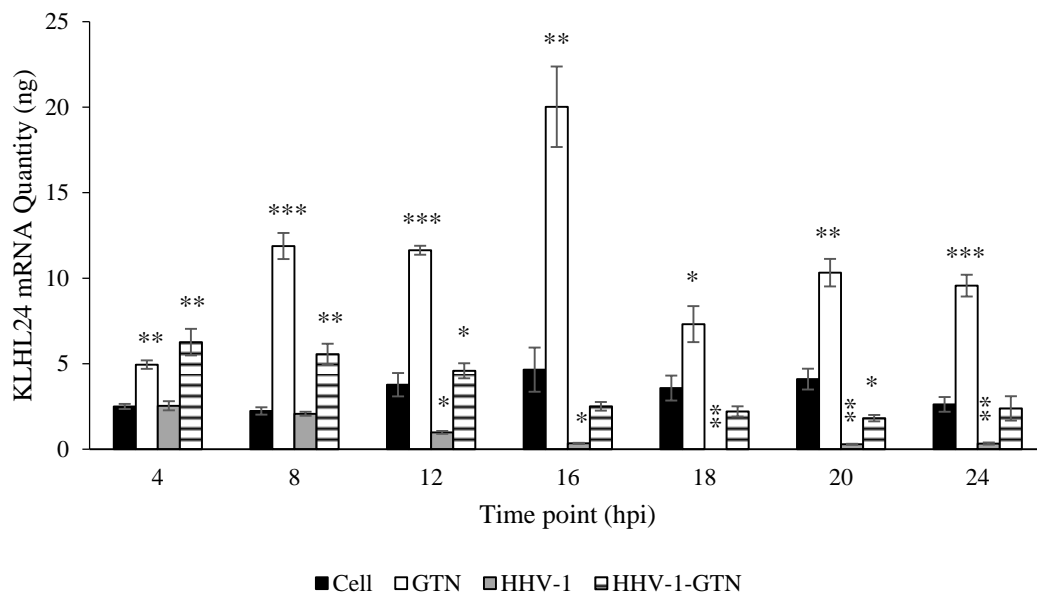

469

470 Figure 1. Expression of *KLHL24* analysed by qPCR absolute quantification. The  
471 black bar (Cell) represents the amount of *KLHL24* in cell control without any  
472 treatment, the white bar (GTN) represents the amount of *KLHL24* in cells treated with  
473 12.5  $\mu$ M GTN, the grey bar (HHV-1) represents the amount of *KLHL24* in cells  
474 infected with HHV-1 at MOI 1, and the horizontal line-patterned bar (HHV-1-GTN)  
475 represents the amount of *KLHL24* in HHV-1 infected cells treated with GTN. The  
476 data generated was the mean of three replicates together with error bars showing the  
477 standard error mean. The significance level  $p < 0.05$  is indicated by \*,  $p < 0.01$  is  
478 indicated by \*\*, and  $p < 0.001$  is indicated by \*\*\*.

479

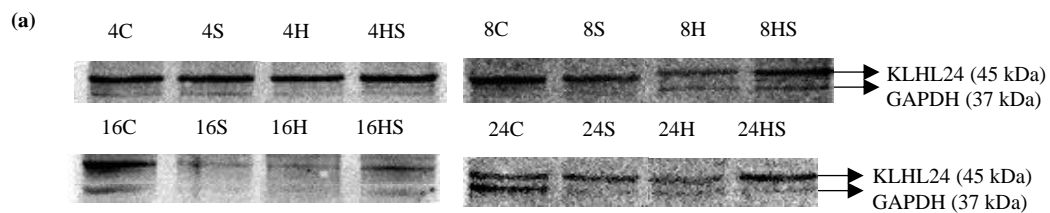

480

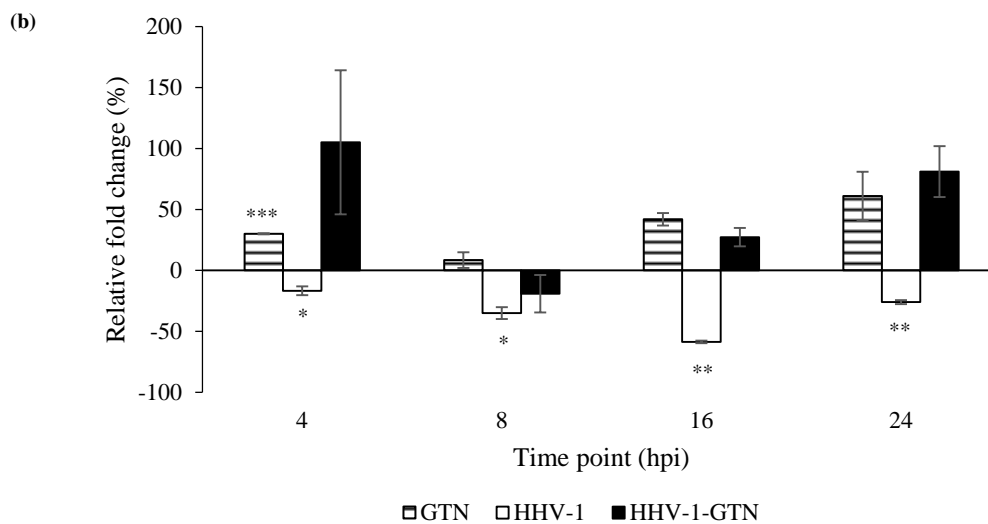

481

482 Figure 2. Expression of *KLHL24* protein level in different treatments and time points  
483 relative to control samples. The horizontal line-patterned bar (GTN) represents Vero

484 cells treated with 12.5  $\mu$ M GTN, the white bar (HHV-1) represents Vero cells infected  
485 with HHV-1 at MOI 1, and the black bar (HHV-1-GTN) represents infected cells  
486 treated with GTN. The data generated was the mean of two replicates together with  
487 error bars showing the standard error mean. The significance level of  $p < 0.05$  is  
488 indicated by \*,  $p < 0.01$  is indicated by \*\*, and  $p < 0.001$  is indicated by \*\*\*.

489

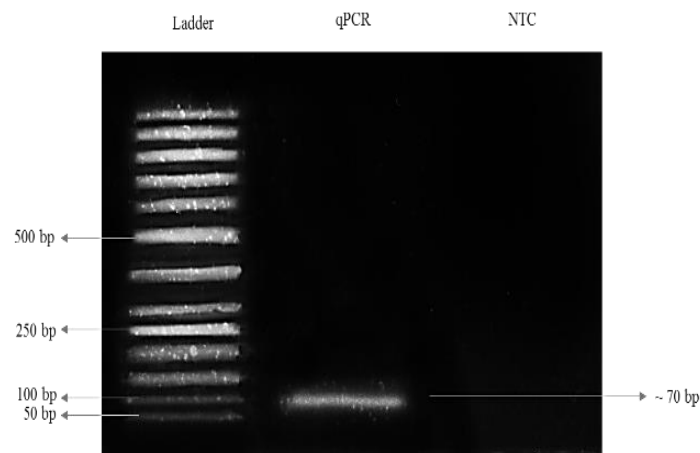

490

491 Figure 3. An electropherogram of agarose gel electrophoresis of hsv1-miR-H27 qPCR  
492 product. The sample well labelled qPCR represents the qPCR product of hsv1-miR-  
493 H27 and the one labelled NTC represents no template control in qPCR. The ladder  
494 used in the electrophoresis was GeneRuler™ 50 bp DNA ladder (Thermo Scientific™,  
495 USA).

496

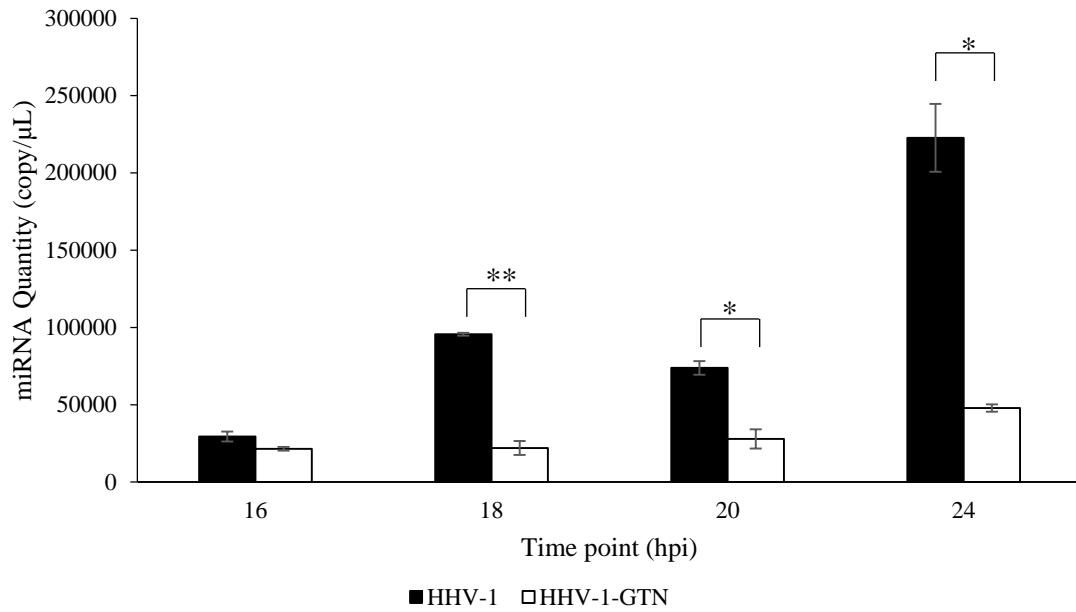

497

498 Figure 4. The expression profile of hsv1-miR-H27 in GTN treated and non-treated  
499 HHV-1 infected Vero cells. The black bar (HHV-1) represents the copy number of  
500 miRNA in HHV-1 infected cells without GTN treatment while the white bar (HHV-1-  
501 GTN) represents the copy number of miRNA in HHV-1 infected cells treated with  
502 GTN. The data generated was the mean of three replicates together with error bars  
503 showing the standard error mean. The significance level of  $p < 0.05$  is indicated by \*  
504 and  $p < 0.01$  is indicated by \*\*.

505
